# Supplementary material for: Variation in the stringency of COVID-19 public health measures on self-reported health, stress, and overall wellbeing in Canada
Source: PubMed Central journal article supplement (PMC10421886; doi:10.1038/s41598-023-39004-w), 2023-08-11
Supplement: 41598_2023_39004_MOESM1_ESM.pdf [file 41598_2023_39004_MOESM1_ESM.pdf]

## Additional Supplemental Tables

Full logistic regression models for each COVID-19 related health outcome and COVID-19 restriction. Each column listed as “OR (95% CI)” represents a single model, with the odds ratio (OR) and 95% confidence interval for each parameter included in the model. All ORs are rounded to two decimal points.

**Table S1:** Adjusted odds ratios from logistic regression for the prevalence of “somewhat/much worse” versus “unchanged/improved” in each COVID-19 health related outcome and school closures

| For each of the following, indicate how you have been personally affected by the COVID-19 pandemic (For each endpoint the probability of “Somewhat/much worse” is modelled, vs “unchanged/improved”). Odds ratio OR (95% confidence interval CI) is always compared to the reference category. |                                |                    |                                 |                    |                                 |                    |                                 |                    |                                 |
|------------------------------------------------------------------------------------------------------------------------------------------------------------------------------------------------------------------------------------------------------------------------------------------------|--------------------------------|--------------------|---------------------------------|--------------------|---------------------------------|--------------------|---------------------------------|--------------------|---------------------------------|
| Variable                                                                                                                                                                                                                                                                                       | Categories                     | Physical health    |                                 | Mental health      |                                 | Stress in life     |                                 | Overall wellbeing  |                                 |
|                                                                                                                                                                                                                                                                                                |                                | OR (95% CI)        | $\chi^2$ , p-value <sup>b</sup> | OR (95% CI)        | $\chi^2$ , p-value <sup>b</sup> | OR (95% CI)        | $\chi^2$ , p-value <sup>b</sup> | OR (95% CI)        | $\chi^2$ , p-value <sup>b</sup> |
| N, HL p-value                                                                                                                                                                                                                                                                                  |                                | 5874, 0.22         |                                 | 5864, 0.02         |                                 | 5873, 0.45         |                                 | 5873, 0.76         |                                 |
| School Closures <sup>a</sup>                                                                                                                                                                                                                                                                   | 3=All levels of school closed  | 1.14 (0.95 - 1.38) | 1.92, 0.166                     | 1.05 (0.86 - 1.29) | 0.23, 0.632                     | 1.22 (0.99 - 1.49) | 3.61, 0.057                     | 1.17 (0.96 - 1.42) | 2.45, 0.117                     |
|                                                                                                                                                                                                                                                                                                | 2=Some levels of school closed | 0.95 (0.81 - 1.11) | 0.37, 0.543                     | 0.70 (0.59 - 0.83) | 17.38, <0.001                   | 0.88 (0.74 - 1.04) | 2.38, 0.123                     | 0.84 (0.71 - 0.99) | 4.59, 0.032                     |
|                                                                                                                                                                                                                                                                                                | 1=Schools recommended to close | Reference          |                                 | Reference          |                                 | Reference          |                                 | Reference          |                                 |
|                                                                                                                                                                                                                                                                                                | 0=No restrictions              | No data            |                                 | No data            |                                 | No data            |                                 | No data            |                                 |
| Age group                                                                                                                                                                                                                                                                                      | 18 to 34                       | 1.38 (1.16 - 1.64) | 13.63, <0.001                   | 1.74 (1.45 - 2.09) | 35.45, <0.001                   | 1.43 (1.19 - 1.73) | 14.49, <0.001                   | 1.27 (1.07 - 1.51) | 7.14, 0.008                     |
|                                                                                                                                                                                                                                                                                                | 35 to 54                       | 1.25 (1.07 - 1.47) | 7.75, 0.005                     | 1.38 (1.17 - 1.62) | 14.82, <0.001                   | 1.22 (1.03 - 1.44) | 5.35, 0.021                     | 1.18 (1.00 - 1.38) | 3.96, 0.047                     |
|                                                                                                                                                                                                                                                                                                | 55+                            | Reference          |                                 | Reference          |                                 | Reference          |                                 | Reference          |                                 |
| Gender                                                                                                                                                                                                                                                                                         | Other/Prefer not to say        | 1.20 (0.70 - 2.08) | 0.44, 0.506                     | 2.27 (1.01 - 5.08) | 3.97, 0.046                     | 0.89 (0.47 - 1.68) | 0.13, 0.719                     | 0.92 (0.51 - 1.67) | 0.07, 0.785                     |
|                                                                                                                                                                                                                                                                                                | Female                         | 0.87 (0.78 - 0.98) | 5.67, 0.017                     | 1.14 (1.02 - 1.29) | 4.97, 0.026                     | 1.33 (1.18 - 1.5)  | 21.79, <0.001                   | 1.03 (0.92 - 1.16) | 0.28, 0.595                     |
|                                                                                                                                                                                                                                                                                                | Male                           | Reference          |                                 | Reference          |                                 | Reference          |                                 | Reference          |                                 |
| Indigenous status                                                                                                                                                                                                                                                                              | Indigenous                     | 1.18 (0.92 - 1.52) | 1.76, 0.184                     | 0.99 (0.76 - 1.3)  | 0.00, 0.958                     | 1.04 (0.79 - 1.38) | 0.08, 0.781                     | 1.02 (0.78 - 1.32) | 0.01, 0.903                     |
|                                                                                                                                                                                                                                                                                                | Non-Indigenous                 | Reference          |                                 | Reference          |                                 | Reference          |                                 | Reference          |                                 |
| Geographical area                                                                                                                                                                                                                                                                              | Urban                          | 1.25 (1.06 - 1.46) | 7.12, 0.008                     | 1.10 (0.93 - 1.31) | 1.25, 0.263                     | 1.12 (0.94 - 1.32) | 1.58, 0.209                     | 1.18 (1.01 - 1.40) | 4.09, 0.043                     |

|                                                   |                          |                    |               |                    |                |                    |                |                    |                |
|---------------------------------------------------|--------------------------|--------------------|---------------|--------------------|----------------|--------------------|----------------|--------------------|----------------|
|                                                   | Suburban                 | 1.21 (1.04 - 1.41) | 5.95, 0.015   | 1.11 (0.94 - 1.3)  | 1.50, 0.220    | 1.17 (0.99 - 1.37) | 3.57, 0.059    | 1.16 (0.99 - 1.35) | 3.34, 0.068    |
|                                                   | Rural/remote             | Reference          |               | Reference          |                | Reference          |                | Reference          |                |
| Income                                            | \$150K or more           | 0.98 (0.81 - 1.19) | 0.05, 0.822   | 1.28 (1.04 - 1.57) | 5.31, 0.021    | 1.38 (1.11 - 1.70) | 8.76, 0.003    | 1.28 (1.05 - 1.57) | 5.96, 0.015    |
|                                                   | \$80K - <\$150K          | 1.10 (0.93 - 1.29) | 1.27, 0.260   | 1.19 (1.00 - 1.43) | 3.79, 0.052    | 1.21 (1.01 - 1.44) | 4.23, 0.040    | 1.14 (0.96 - 1.35) | 2.12, 0.145    |
|                                                   | \$40K - <\$80K           | 1.03 (0.87 - 1.21) | 0.11, 0.742   | 1.05 (0.88 - 1.26) | 0.30, 0.584    | 1.07 (0.89 - 1.28) | 0.50, 0.478    | 0.98 (0.83 - 1.17) | 0.05, 0.829    |
|                                                   | less than \$40K          | Reference          |               | Reference          |                | Reference          |                | Reference          |                |
| Work/attend school outside home                   | Yes                      | 0.87 (0.70 - 1.07) | 1.84, 0.175   | 1.08 (0.86 - 1.35) | 0.42, 0.518    | 1.06 (0.84 - 1.34) | 0.27, 0.603    | 1.01 (0.81 - 1.26) | 0.01, 0.920    |
|                                                   | No                       | Reference          |               | Reference          |                | Reference          |                | Reference          |                |
| Work/attend school inside home                    | Yes                      | 1.04 (0.85 - 1.28) | 0.17, 0.682   | 0.98 (0.79 - 1.23) | 0.02, 0.893    | 1.03 (0.82 - 1.29) | 0.05, 0.820    | 0.97 (0.78 - 1.20) | 0.08, 0.781    |
|                                                   | No                       | Reference          |               | Reference          |                | Reference          |                | Reference          |                |
| Retired                                           | Yes                      | 0.85 (0.66 - 1.10) | 1.47, 0.226   | 0.75 (0.57 - 0.99) | 4.23, 0.040    | 0.74 (0.56 - 0.97) | 4.68, 0.031    | 0.76 (0.58 - 0.98) | 4.41, 0.036    |
|                                                   | No                       | Reference          |               | Reference          |                | Reference          |                | Reference          |                |
| Unemployed                                        | Yes                      | 1.04 (0.80 - 1.36) | 0.09, 0.758   | 1.08 (0.80 - 1.45) | 0.27, 0.606    | 1.19 (0.88 - 1.60) | 1.21, 0.270    | 1.04 (0.79 - 1.38) | 0.09, 0.765    |
|                                                   | No                       | Reference          |               | Reference          |                | Reference          |                | Reference          |                |
| On paid leave (sick leave, maternity, disability) | Yes                      | 0.61 (0.42 - 0.90) | 6.16, 0.013   | 1.27 (0.81 - 1.98) | 1.07, 0.301    | 1.01 (0.65 - 1.58) | 0.00, 0.952    | 1.23 (0.81 - 1.88) | 0.93, 0.336    |
|                                                   | No                       | Reference          |               | Reference          |                | Reference          |                | Reference          |                |
| Other                                             | Yes                      | 1.10 (0.78 - 1.55) | 0.28, 0.600   | 1.23 (0.85 - 1.77) | 1.18, 0.277    | 1.05 (0.73 - 1.53) | 0.08, 0.780    | 0.90 (0.63 - 1.29) | 0.31, 0.576    |
|                                                   | No                       | Reference          |               | Reference          |                | Reference          |                | Reference          |                |
| Rated physical health in general, for one's age   | Fair/poor                | 1.77 (1.52 - 2.07) | 52.83, <0.001 | 0.94 (0.79 - 1.12) | 0.55, 0.458    | 1.29 (1.07 - 1.54) | 7.44, 0.006    | 1.32 (1.12 - 1.56) | 10.69, 0.001   |
|                                                   | Excellent/very good/good | Reference          |               | Reference          |                | Reference          |                | Reference          |                |
| Rated mental health in general, for one's age     | Fair/poor                | 1.50 (1.29 - 1.75) | 26.28, <0.001 | 3.47 (2.83 - 4.26) | 143.33, <0.001 | 2.26 (1.84 - 2.76) | 62.77, <0.001  | 2.62 (2.19 - 3.14) | 111.69, <0.001 |
|                                                   | Excellent/very good/good | Reference          |               | Reference          |                | Reference          |                | Reference          |                |
| Anxiety or depression                             | Diagnosed                | 1.57 (1.34 - 1.83) | 32.17, <0.001 | 1.99 (1.67 - 2.35) | 62.19, <0.001  | 1.59 (1.33 - 1.89) | 27.23, <0.001  | 1.95 (1.66 - 2.30) | 65.24, <0.001  |
|                                                   | Suffer                   | 1.56 (1.35 - 1.80) | 35.67, <0.001 | 2.88 (2.44 - 3.41) | 153.72, <0.001 | 2.50 (2.10 - 2.97) | 105.00, <0.001 | 2.43 (2.08 - 2.83) | 126.36, <0.001 |
|                                                   | Does not apply           | Reference          |               | Reference          |                | Reference          |                | Reference          |                |

|                                                       |                    |               |                    |               |                    |               |                    |               |
|-------------------------------------------------------|--------------------|---------------|--------------------|---------------|--------------------|---------------|--------------------|---------------|
| Rate of deaths during the previous 7 days             | 0.98 (0.80 - 1.21) | 0.04, 0.845   | 0.84 (0.68 - 1.05) | 2.27, 0.132   | 0.67 (0.53 - 0.84) | 12.39, <0.001 | 0.94 (0.76 - 1.16) | 0.36, 0.546   |
| Rate of cases during the previous 7 days <sup>c</sup> | 1.24 (1.13 - 1.37) | 20.25, <0.001 | 1.32 (1.19 - 1.46) | 28.52, <0.001 | 1.47 (1.32 - 1.64) | 51.34, <0.001 | 1.20 (1.09 - 1.32) | 13.52, <0.001 |

N number of complete observations used in the model; HL Hosmer-Lemeshow goodness of fit test, if  $p > 0.05$  then the model fits the data well; <sup>a</sup> people are assigned the OxCGRT value for school closures that corresponds to the date they filled out the survey; <sup>b</sup> Wald Chi-square test from logistic regression with 1 degree of freedom comparing each level to the reference level within a variable, p-value based on Bonferroni correction. <sup>c</sup> OR is given for every 100 new cases reported. In instances where the confidence interval of the OR includes 1.00 yet is significant  $p < 0.05$ , this is due to rounding error.

**Table S2:** Adjusted odds ratios from logistic regression for the prevalence of “somewhat/much worse” versus “unchanged/improved” in each COVID-19 health related outcome and business/workplace closure

| For each of the following, indicate how you have been personally affected by the COVID-19 pandemic (For each endpoint the probability of “Somewhat/much worse” is modelled, vs “unchanged/improved”). Odds ratio OR (95% confidence interval CI) is always compared to the reference category. |                                                                |                    |                                   |                    |                                   |                    |                                   |                    |                                   |
|------------------------------------------------------------------------------------------------------------------------------------------------------------------------------------------------------------------------------------------------------------------------------------------------|----------------------------------------------------------------|--------------------|-----------------------------------|--------------------|-----------------------------------|--------------------|-----------------------------------|--------------------|-----------------------------------|
| Variable                                                                                                                                                                                                                                                                                       | Categories                                                     | Physical health    |                                   | Mental health      |                                   | Stress in life     |                                   | Overall wellbeing  |                                   |
|                                                                                                                                                                                                                                                                                                |                                                                | OR (95% CI)        | $\chi^2_1$ , p-value <sup>b</sup> | OR (95% CI)        | $\chi^2_1$ , p-value <sup>b</sup> | OR (95% CI)        | $\chi^2_1$ , p-value <sup>b</sup> | OR (95% CI)        | $\chi^2_1$ , p-value <sup>b</sup> |
| N, HL p-value                                                                                                                                                                                                                                                                                  |                                                                | 5874, 0.07         |                                   | 5864, 0.47         |                                   | 5873, 0.15         |                                   | 5873, 0.23         |                                   |
| Business/<br>workplace<br>closures <sup>a</sup>                                                                                                                                                                                                                                                | 3=All non-essential<br>businesses/workplaces<br>closed         | 1.33 (0.82 - 2.17) | 1.32, 0.250                       | 1.61 (0.98 - 2.66) | 3.49, 0.062                       | 0.81 (0.49 - 1.35) | 0.65, 0.421                       | 1.40 (0.86 - 2.27) | 1.82, 0.178                       |
|                                                                                                                                                                                                                                                                                                | 2=Some non-essential<br>businesses/workplaces<br>closed        | 1.05 (0.66 - 1.67) | 0.04, 0.843                       | 1.12 (0.70 - 1.79) | 0.22, 0.643                       | 0.60 (0.37 - 0.96) | 4.48, 0.034                       | 1.06 (0.67 - 1.67) | 0.06, 0.809                       |
|                                                                                                                                                                                                                                                                                                | 1=Recommend to close<br>non-essential<br>businesses/workplaces | 1.49 (0.82 - 2.73) | 1.72, 0.190                       | 1.31 (0.71 - 2.44) | 0.75, 0.385                       | 0.81 (0.43 - 1.50) | 0.45, 0.501                       | 1.05 (0.57 - 1.91) | 0.02, 0.883                       |
|                                                                                                                                                                                                                                                                                                | 0=No closures                                                  | Reference          |                                   | Reference          |                                   | Reference          |                                   | Reference          |                                   |
| Age group                                                                                                                                                                                                                                                                                      | 18 to 34                                                       | 1.38 (1.16 - 1.64) | 13.58,<br><0.001                  | 1.72 (1.43 - 2.06) | 34.25, <0.001                     | 1.42 (1.18 - 1.71) | 13.87,<br><0.001                  | 1.27 (1.06 - 1.51) | 6.95, 0.008                       |
|                                                                                                                                                                                                                                                                                                | 35 to 54                                                       | 1.25 (1.07 - 1.47) | 7.78, 0.005                       | 1.36 (1.15 - 1.60) | 13.44, <0.001                     | 1.21 (1.03 - 1.43) | 5.11, 0.024                       | 1.17 (0.99 - 1.37) | 3.58, 0.058                       |
|                                                                                                                                                                                                                                                                                                | 55+                                                            | Reference          |                                   | Reference          |                                   | Reference          |                                   | Reference          |                                   |
| Gender                                                                                                                                                                                                                                                                                         | Other/Prefer not to say                                        | 1.20 (0.69 - 2.07) | 0.43, 0.513                       | 2.27 (1.02 - 5.07) | 4.02, 0.045                       | 0.88 (0.47 - 1.65) | 0.16, 0.689                       | 0.92 (0.51 - 1.67) | 0.07, 0.791                       |
|                                                                                                                                                                                                                                                                                                | Female                                                         | 0.88 (0.78 - 0.98) | 5.48, 0.019                       | 1.14 (1.02 - 1.29) | 4.93, 0.026                       | 1.33 (1.18 - 1.50) | 21.61,<br><0.001                  | 1.03 (0.92 - 1.16) | 0.29, 0.593                       |
|                                                                                                                                                                                                                                                                                                | Male                                                           | Reference          |                                   | Reference          |                                   | Reference          |                                   | Reference          |                                   |
| Indigenous<br>status                                                                                                                                                                                                                                                                           | Indigenous                                                     | 1.18 (0.92 - 1.52) | 1.74, 0.187                       | 1.00 (0.76 - 1.31) | 0.00, 0.980                       | 1.04 (0.79 - 1.37) | 0.07, 0.785                       | 1.01 (0.78 - 1.32) | 0.01, 0.919                       |
|                                                                                                                                                                                                                                                                                                | Non-Indigenous                                                 | Reference          |                                   | Reference          |                                   | Reference          |                                   | Reference          |                                   |
| Geographical<br>area                                                                                                                                                                                                                                                                           | Urban                                                          | 1.25 (1.06 - 1.46) | 7.07, 0.008                       | 1.10 (0.93 - 1.30) | 1.17, 0.279                       | 1.11 (0.94 - 1.32) | 1.45, 0.229                       | 1.18 (1.00 - 1.39) | 3.92, 0.048                       |
|                                                                                                                                                                                                                                                                                                | Suburban                                                       | 1.22 (1.04 - 1.42) | 6.29, 0.012                       | 1.12 (0.95 - 1.31) | 1.90, 0.168                       | 1.18 (1 - 1.38)    | 3.93, 0.047                       | 1.16 (0.99 - 1.36) | 3.59, 0.058                       |
|                                                                                                                                                                                                                                                                                                | Rural/remote                                                   | Reference          |                                   | Reference          |                                   | Reference          |                                   | Reference          |                                   |
| Income                                                                                                                                                                                                                                                                                         | \$150K or more                                                 | 0.97 (0.8 - 1.18)  | 0.09, 0.768                       | 1.28 (1.04 - 1.58) | 5.50, 0.019                       | 1.36 (1.10 - 1.68) | 8.08, 0.004                       | 1.29 (1.05 - 1.57) | 6.14, 0.013                       |

|                                                       |                          |                    |               |                    |                |                    |                |                    |                |
|-------------------------------------------------------|--------------------------|--------------------|---------------|--------------------|----------------|--------------------|----------------|--------------------|----------------|
|                                                       | \$80K - <\$150K          | 1.09 (0.93 - 1.29) | 1.10, 0.295   | 1.19 (0.99 - 1.42) | 3.53, 0.060    | 1.19 (1.00 - 1.43) | 3.71, 0.054    | 1.13 (0.96 - 1.35) | 2.11, 0.146    |
|                                                       | \$40K - <\$80K           | 1.03 (0.87 - 1.21) | 0.10, 0.755   | 1.05 (0.88 - 1.26) | 0.28, 0.599    | 1.06 (0.88 - 1.27) | 0.39, 0.530    | 0.98 (0.83 - 1.17) | 0.04, 0.833    |
|                                                       | less than \$40K          | Reference          |               | Reference          |                | Reference          |                | Reference          |                |
| Work/attend school outside home                       | Yes                      | 0.87 (0.71 - 1.07) | 1.72, 0.190   | 1.07 (0.85 - 1.34) | 0.34, 0.561    | 1.06 (0.84 - 1.33) | 0.25, 0.617    | 1.00 (0.81 - 1.25) | 0.00, 0.969    |
|                                                       | No                       | Reference          |               | Reference          |                | Reference          |                | Reference          |                |
| Work/attend school inside home                        | Yes                      | 1.05 (0.85 - 1.29) | 0.21, 0.649   | 0.97 (0.77 - 1.21) | 0.09, 0.758    | 1.02 (0.82 - 1.29) | 0.05, 0.832    | 0.96 (0.78 - 1.19) | 0.14, 0.707    |
|                                                       | No                       | Reference          |               | Reference          |                | Reference          |                | Reference          |                |
| Retired                                               | Yes                      | 0.85 (0.66 - 1.10) | 1.47, 0.225   | 0.74 (0.57 - 0.97) | 4.77, 0.029    | 0.73 (0.56 - 0.96) | 4.97, 0.026    | 0.75 (0.57 - 0.97) | 4.79, 0.029    |
|                                                       | No                       | Reference          |               | Reference          |                | Reference          |                | Reference          |                |
| Unemployed                                            | Yes                      | 1.05 (0.80 - 1.37) | 0.12, 0.729   | 1.09 (0.81 - 1.46) | 0.29, 0.587    | 1.19 (0.88 - 1.61) | 1.22, 0.268    | 1.05 (0.79 - 1.39) | 0.10, 0.749    |
|                                                       | No                       | Reference          |               | Reference          |                | Reference          |                | Reference          |                |
| On paid leave (sick leave, maternity, disability)     | Yes                      | 0.62 (0.42 - 0.91) | 5.82, 0.016   | 1.31 (0.83 - 2.05) | 1.36, 0.244    | 1.03 (0.66 - 1.60) | 0.01, 0.911    | 1.25 (0.82 - 1.91) | 1.06, 0.304    |
|                                                       | No                       | Reference          |               | Reference          |                | Reference          |                | Reference          |                |
| Other                                                 | Yes                      | 1.10 (0.78 - 1.56) | 0.30, 0.584   | 1.21 (0.84 - 1.75) | 1.01, 0.315    | 1.05 (0.72 - 1.52) | 0.06, 0.801    | 0.89 (0.63 - 1.27) | 0.39, 0.532    |
|                                                       | No                       | Reference          |               | Reference          |                | Reference          |                | Reference          |                |
| Rated physical health in general, for one's age       | Fair/poor                | 1.77 (1.52 - 2.07) | 52.70, <0.001 | 0.93 (0.78 - 1.11) | 0.58, 0.445    | 1.28 (1.07 - 1.53) | 7.22, 0.007    | 1.32 (1.12 - 1.56) | 10.82, 0.001   |
|                                                       | Excellent/very good/good | Reference          |               | Reference          |                | Reference          |                | Reference          |                |
| Rated mental health in general, for one's age         | Fair/poor                | 1.50 (1.28 - 1.75) | 25.88, <0.001 | 3.45 (2.82 - 4.23) | 142.18, <0.001 | 2.25 (1.84 - 2.75) | 62.41, <0.001  | 2.62 (2.19 - 3.13) | 111.11, <0.001 |
|                                                       | Excellent/very good/good | Reference          |               | Reference          |                | Reference          |                | Reference          |                |
| Anxiety or depression                                 | Diagnosed                | 1.57 (1.34 - 1.83) | 32.07, <0.001 | 2.00 (1.68 - 2.37) | 63.34, <0.001  | 1.59 (1.34 - 1.90) | 27.69, <0.001  | 1.96 (1.67 - 2.30) | 66.03, <0.001  |
|                                                       | Suffer                   | 1.55 (1.34 - 1.80) | 34.96, <0.001 | 2.89 (2.45 - 3.42) | 154.98, <0.001 | 2.49 (2.09 - 2.97) | 104.51, <0.001 | 2.43 (2.08 - 2.84) | 126.92, <0.001 |
|                                                       | Does not apply           | Reference          |               | Reference          |                | Reference          |                | Reference          |                |
| Rate of deaths during the previous 7 days             |                          | 0.92 (0.74 - 1.13) | 0.62, 0.430   | 0.74 (0.59 - 0.92) | 7.23, 0.007    | 0.66 (0.52 - 0.82) | 13.39, <0.001  | 0.89 (0.72 - 1.11) | 1.05, 0.304    |
| Rate of cases during the previous 7 days <sup>c</sup> |                          | 1.28 (1.16 - 1.41) | 23.52, <0.001 | 1.36 (1.22 - 1.51) | 31.50, <0.001  | 1.56 (1.39 - 1.74) | 61.77, <0.001  | 1.22 (1.10 - 1.35) | 14.46, <0.001  |

N number of complete observations used in the model; HL Hosmer-Lemeshow goodness of fit test, if  $p > 0.05$  then the model fits the data well; <sup>a</sup> people are assigned the OxCGRT value for business/workplace closures that corresponds to the date they filled out the survey; <sup>b</sup> Wald Chi-square test from logistic regression with 1 degree of freedom comparing each level to the reference level within a variable, p-value based on Bonferroni correction; <sup>c</sup> OR is given for every 100 new cases reported. In instances where the confidence interval of the OR includes 1.00 yet is significant  $p < 0.05$ , this is due to rounding error.

**Table S3:** Adjusted odds ratios from logistic regression for the prevalence of “somewhat/much worse” versus “unchanged/improved” in each COVID-19 health related outcome and restrictions on gatherings

| For each of the following, indicate how you have been personally affected by the COVID-19 pandemic (For each endpoint the probability of “Somewhat/much worse” is modelled, vs “unchanged/improved”). Odds ratio OR (95% confidence interval CI) is always compared to the reference category. |                         |                    |                                   |                    |                                   |                    |                                   |                    |                                   |
|------------------------------------------------------------------------------------------------------------------------------------------------------------------------------------------------------------------------------------------------------------------------------------------------|-------------------------|--------------------|-----------------------------------|--------------------|-----------------------------------|--------------------|-----------------------------------|--------------------|-----------------------------------|
| Variable                                                                                                                                                                                                                                                                                       | Categories              | Physical health    |                                   | Mental health      |                                   | Stress in life     |                                   | Overall wellbeing  |                                   |
|                                                                                                                                                                                                                                                                                                |                         | OR (95% CI)        | $\chi^2_1$ , p-value <sup>b</sup> | OR (95% CI)        | $\chi^2_1$ , p-value <sup>b</sup> | OR (95% CI)        | $\chi^2_1$ , p-value <sup>b</sup> | OR (95% CI)        | $\chi^2_1$ , p-value <sup>b</sup> |
| N, HL p-value                                                                                                                                                                                                                                                                                  |                         | 5874, 0.51         |                                   | 5864, 0.06         |                                   | 5873, 0.36         |                                   | 5873, 0.21         |                                   |
| Restrictions on gatherings <sup>a</sup>                                                                                                                                                                                                                                                        | 4 = ≤10 people          | 0.70 (0.54 - 0.91) | 6.86, 0.009                       | 0.83 (0.63 - 1.10) | 1.61, 0.205                       | 0.75 (0.57 - 1.00) | 3.95, 0.047                       | 0.90 (0.68 - 1.17) | 0.64, 0.425                       |
|                                                                                                                                                                                                                                                                                                | 3 = 11-100 people       | Reference          |                                   | Reference          |                                   | Reference          |                                   | Reference          |                                   |
|                                                                                                                                                                                                                                                                                                | 2 = 101-1000 people     | No data            |                                   | No data            |                                   | No data            |                                   | No data            |                                   |
|                                                                                                                                                                                                                                                                                                | 1 = >1000 people        | No data            |                                   | No data            |                                   | No data            |                                   | No data            |                                   |
|                                                                                                                                                                                                                                                                                                | 0 = no restrictions     | No data            |                                   | No data            |                                   | No data            |                                   | No data            |                                   |
| Age group                                                                                                                                                                                                                                                                                      | 18 to 34                | 1.38 (1.16 - 1.64) | 13.52, <0.001                     | 1.72 (1.43 - 2.06) | 34.06, <0.001                     | 1.43 (1.19 - 1.72) | 14.21, <0.001                     | 1.26 (1.06 - 1.51) | 6.90, 0.009                       |
|                                                                                                                                                                                                                                                                                                | 35 to 54                | 1.24 (1.06 - 1.46) | 7.36, 0.007                       | 1.35 (1.14 - 1.58) | 12.83, <0.001                     | 1.20 (1.02 - 1.42) | 4.80, 0.028                       | 1.16 (0.99 - 1.36) | 3.36, 0.067                       |
|                                                                                                                                                                                                                                                                                                | 55+                     | Reference          |                                   | Reference          |                                   | Reference          |                                   | Reference          |                                   |
| Gender                                                                                                                                                                                                                                                                                         | Other/Prefer not to say | 1.20 (0.69 - 2.07) | 0.43, 0.513                       | 2.28 (1.02 - 5.09) | 4.08, 0.043                       | 0.89 (0.47 - 1.67) | 0.14, 0.712                       | 0.93 (0.51 - 1.68) | 0.06, 0.808                       |
|                                                                                                                                                                                                                                                                                                | Female                  | 0.87 (0.78 - 0.97) | 6.10, 0.013                       | 1.13 (1.00 - 1.27) | 4.07, 0.044                       | 1.32 (1.17 - 1.48) | 20.42, <0.001                     | 1.02 (0.91 - 1.14) | 0.13, 0.713                       |
|                                                                                                                                                                                                                                                                                                | Male                    | Reference          |                                   | Reference          |                                   | Reference          |                                   | Reference          |                                   |
| Indigenous status                                                                                                                                                                                                                                                                              | Indigenous              | 1.16 (0.90 - 1.49) | 1.37, 0.241                       | 0.98 (0.74 - 1.28) | 0.03, 0.857                       | 1.01 (0.77 - 1.34) | 0.01, 0.930                       | 1.00 (0.77 - 1.29) | 0.00, 0.985                       |
|                                                                                                                                                                                                                                                                                                | Non-Indigenous          | Reference          |                                   | Reference          |                                   | Reference          |                                   | Reference          |                                   |
| Geographical area                                                                                                                                                                                                                                                                              | Urban                   | 1.23 (1.05 - 1.45) | 6.47, 0.011                       | 1.09 (0.92 - 1.29) | 1.03, 0.310                       | 1.10 (0.93 - 1.31) | 1.30, 0.254                       | 1.18 (1.00 - 1.38) | 3.75, 0.053                       |
|                                                                                                                                                                                                                                                                                                | Suburban                | 1.21 (1.04 - 1.41) | 5.98, 0.014                       | 1.11 (0.95 - 1.30) | 1.72, 0.189                       | 1.17 (1.00 - 1.37) | 3.69, 0.055                       | 1.16 (0.99 - 1.35) | 3.44, 0.064                       |
|                                                                                                                                                                                                                                                                                                | Rural/remote            | Reference          |                                   | Reference          |                                   | Reference          |                                   | Reference          |                                   |
| Income                                                                                                                                                                                                                                                                                         | \$150K or more          | 0.97 (0.80 - 1.18) | 0.07, 0.791                       | 1.29 (1.05 - 1.59) | 5.91, 0.015                       | 1.38 (1.12 - 1.71) | 9.01, 0.003                       | 1.30 (1.06 - 1.58) | 6.46, 0.011                       |

|                                                       |                          |                    |               |                    |                |                    |                |                    |                |
|-------------------------------------------------------|--------------------------|--------------------|---------------|--------------------|----------------|--------------------|----------------|--------------------|----------------|
|                                                       | \$80K - <\$150K          | 1.10 (0.93 - 1.29) | 1.26, 0.261   | 1.20 (1.01 - 1.44) | 4.15, 0.042    | 1.21 (1.02 - 1.45) | 4.53, 0.033    | 1.15 (0.97 - 1.36) | 2.48, 0.116    |
|                                                       | \$40K - <\$80K           | 1.02 (0.87 - 1.21) | 0.08, 0.777   | 1.05 (0.88 - 1.26) | 0.31, 0.579    | 1.07 (0.89 - 1.28) | 0.48, 0.489    | 0.98 (0.83 - 1.17) | 0.04, 0.847    |
|                                                       | less than \$40K          | Reference          |               | Reference          |                | Reference          |                | Reference          |                |
| Work/attend school outside home                       | Yes                      | 0.86 (0.70 - 1.06) | 1.96, 0.161   | 1.05 (0.84 - 1.32) | 0.19, 0.666    | 1.05 (0.83 - 1.32) | 0.16, 0.690    | 0.99 (0.80 - 1.23) | 0.00, 0.954    |
|                                                       | No                       | Reference          |               | Reference          |                | Reference          |                | Reference          |                |
| Work/attend school inside home                        | Yes                      | 1.05 (0.86 - 1.29) | 0.23, 0.633   | 0.96 (0.77 - 1.20) | 0.11, 0.740    | 1.02 (0.82 - 1.28) | 0.04, 0.839    | 0.96 (0.77 - 1.19) | 0.15, 0.701    |
|                                                       | No                       | Reference          |               | Reference          |                | Reference          |                | Reference          |                |
| Retired                                               | Yes                      | 0.85 (0.65 - 1.09) | 1.64, 0.201   | 0.73 (0.56 - 0.95) | 5.27, 0.022    | 0.73 (0.55 - 0.95) | 5.31, 0.021    | 0.74 (0.57 - 0.96) | 5.16, 0.023    |
|                                                       | No                       | Reference          |               | Reference          |                | Reference          |                | Reference          |                |
| Unemployed                                            | Yes                      | 1.05 (0.80 - 1.37) | 0.12, 0.730   | 1.08 (0.80 - 1.45) | 0.25, 0.618    | 1.19 (0.88 - 1.60) | 1.23, 0.268    | 1.04 (0.79 - 1.38) | 0.09, 0.761    |
|                                                       | No                       | Reference          |               | Reference          |                | Reference          |                | Reference          |                |
| On paid leave (sick leave, maternity, disability)     | Yes                      | 0.62 (0.42 - 0.91) | 5.91, 0.015   | 1.28 (0.82 - 2.01) | 1.19, 0.276    | 1.02 (0.65 - 1.60) | 0.01, 0.926    | 1.24 (0.81 - 1.89) | 0.97, 0.324    |
|                                                       | No                       | Reference          |               | Reference          |                | Reference          |                | Reference          |                |
| Other                                                 | Yes                      | 1.08 (0.77 - 1.53) | 0.20, 0.658   | 1.19 (0.82 - 1.72) | 0.85, 0.356    | 1.03 (0.71 - 1.50) | 0.03, 0.861    | 0.88 (0.62 - 1.26) | 0.47, 0.491    |
|                                                       | No                       | Reference          |               | Reference          |                | Reference          |                | Reference          |                |
| Rated physical health in general, for one's age       | Fair/poor                | 1.77 (1.51 - 2.06) | 52.31, <0.001 | 0.94 (0.79 - 1.12) | 0.54, 0.462    | 1.29 (1.07 - 1.54) | 7.52, 0.006    | 1.32 (1.12 - 1.57) | 10.88, <0.001  |
|                                                       | Excellent/very good/good | Reference          |               | Reference          |                | Reference          |                | Reference          |                |
| Rated mental health in general, for one's age         | Fair/poor                | 1.51 (1.29 - 1.77) | 27.10, <0.001 | 3.50 (2.85 - 4.29) | 145.43, <0.001 | 2.28 (1.87 - 2.79) | 64.55, <0.001  | 2.64 (2.21 - 3.16) | 113.78, <0.001 |
|                                                       | Excellent/very good/good | Reference          |               | Reference          |                | Reference          |                | Reference          |                |
| Anxiety or depression                                 | Diagnosed                | 1.57 (1.35 - 1.84) | 32.78, <0.001 | 2.00 (1.69 - 2.38) | 64.40, <0.001  | 1.60 (1.34 - 1.90) | 28.19, <0.001  | 1.97 (1.67 - 2.31) | 66.95, <0.001  |
|                                                       | Suffer                   | 1.56 (1.35 - 1.80) | 35.68, <0.001 | 2.91 (2.46 - 3.44) | 157.45, <0.001 | 2.50 (2.10 - 2.98) | 106.08, <0.001 | 2.44 (2.09 - 2.85) | 128.72, <0.001 |
|                                                       | Does not apply           | Reference          |               | Reference          |                | Reference          |                | Reference          |                |
| Rate of deaths during the previous 7 days             |                          | 1.16 (0.98 - 1.37) | 2.83, 0.092   | 1.02 (0.85 - 1.22) | 0.04, 0.840    | 0.83 (0.69 - 1.00) | 3.74, 0.053    | 1.15 (0.97 - 1.37) | 2.47, 0.116    |
| Rate of cases during the previous 7 days <sup>c</sup> |                          | 1.30 (1.17 - 1.43) | 25.83, <0.001 | 1.36 (1.22 - 1.51) | 30.91, <0.001  | 1.54 (1.37 - 1.72) | 56.33, <0.001  | 1.22 (1.10 - 1.35) | 14.20, <0.001  |

N number of complete observations used in the model; HL Hosmer-Lemeshow goodness of fit test, if  $p > 0.05$  then the model fits the data well; <sup>a</sup> people are assigned the OxCGRT value for restrictions on gatherings that corresponds to the date they filled out the survey; <sup>b</sup> Wald Chi-square test from logistic regression with 1 degree of freedom comparing each level to the reference level within a variable, p-value based on Bonferroni correction; <sup>c</sup> OR is given for every 100 new cases reported. In instances where the confidence interval of the OR includes 1.00 yet is significant  $p < 0.05$ , this is due to rounding error.

**Table S4:** Adjusted odds ratios from logistic regression for the prevalence of “somewhat/much worse” versus “unchanged/improved” in each COVID-19 health related outcome and stay at home orders

| For each of the following, indicate how you have been personally affected by the COVID-19 pandemic (For each endpoint the probability of “Somewhat/much worse” is modelled, vs “unchanged/improved”). Odds ratio OR (95% confidence interval CI) is always compared to the reference category. |                                                  |                    |                                   |                    |                                   |                    |                                   |                    |                                   |
|------------------------------------------------------------------------------------------------------------------------------------------------------------------------------------------------------------------------------------------------------------------------------------------------|--------------------------------------------------|--------------------|-----------------------------------|--------------------|-----------------------------------|--------------------|-----------------------------------|--------------------|-----------------------------------|
| Variable                                                                                                                                                                                                                                                                                       | Categories                                       | Physical health    |                                   | Mental health      |                                   | Stress in life     |                                   | Overall wellbeing  |                                   |
|                                                                                                                                                                                                                                                                                                |                                                  | OR (95% CI)        | $\chi^2_1$ , p-value <sup>b</sup> | OR (95% CI)        | $\chi^2_1$ , p-value <sup>b</sup> | OR (95% CI)        | $\chi^2_1$ , p-value <sup>b</sup> | OR (95% CI)        | $\chi^2_1$ , p-value <sup>b</sup> |
| N, HL p-value                                                                                                                                                                                                                                                                                  |                                                  | 5874, 0.49         |                                   | 5864, 0.003        |                                   | 5873, 0.53         |                                   | 5873, 0.33         |                                   |
| Stay at home orders <sup>a</sup>                                                                                                                                                                                                                                                               | 3= Leaving home permitted for minimal exceptions | No data            |                                   | No data            |                                   | No data            |                                   | No data            |                                   |
|                                                                                                                                                                                                                                                                                                | 2=Leaving home permitted for essential trips     | 1.00 (0.83 - 1.20) | 0.00, 0.996                       | 0.75 (0.62 - 0.91) | 8.51, 0.004                       | 0.81 (0.67 - 0.98) | 4.83, 0.028                       | 0.93 (0.77 - 1.12) | 0.59, 0.441                       |
|                                                                                                                                                                                                                                                                                                | 1=Recommend not leave home                       | Reference          |                                   | Reference          |                                   | Reference          |                                   | Reference          |                                   |
|                                                                                                                                                                                                                                                                                                | 0=No restrictions                                | No data            |                                   | No data            |                                   | No data            |                                   | No data            |                                   |
| Age group                                                                                                                                                                                                                                                                                      | 18 to 34                                         | 1.38 (1.16 - 1.64) | 13.65, <0.001                     | 1.72 (1.44 - 2.06) | 34.52, <0.001                     | 1.43 (1.19 - 1.72) | 14.47, <0.001                     | 1.27 (1.06 - 1.51) | 6.97, 0.008                       |
|                                                                                                                                                                                                                                                                                                | 35 to 54                                         | 1.25 (1.06 - 1.46) | 7.42, 0.006                       | 1.36 (1.16 - 1.60) | 13.72, <0.001                     | 1.21 (1.03 - 1.43) | 5.18, 0.023                       | 1.16 (0.99 - 1.36) | 3.47, 0.062                       |
|                                                                                                                                                                                                                                                                                                | 55+                                              | Reference          |                                   | Reference          |                                   | Reference          |                                   | Reference          |                                   |
| Gender                                                                                                                                                                                                                                                                                         | Other/Prefer not to say                          | 1.21 (0.70 - 2.09) | 0.46, 0.496                       | 2.29 (1.02 - 5.10) | 4.08, 0.043                       | 0.89 (0.48 - 1.67) | 0.13, 0.722                       | 0.93 (0.51 - 1.68) | 0.06, 0.811                       |
|                                                                                                                                                                                                                                                                                                | Female                                           | 0.87 (0.78 - 0.97) | 6.07, 0.014                       | 1.13 (1.00 - 1.27) | 4.00, 0.045                       | 1.32 (1.17 - 1.48) | 20.35, <0.001                     | 1.02 (0.91 - 1.14) | 0.13, 0.715                       |
|                                                                                                                                                                                                                                                                                                | Male                                             | Reference          |                                   | Reference          |                                   | Reference          |                                   | Reference          |                                   |
| Indigenous status                                                                                                                                                                                                                                                                              | Indigenous                                       | 1.17 (0.91 - 1.50) | 1.54, 0.215                       | 0.95 (0.72 - 1.25) | 0.13, 0.720                       | 1.00 (0.75 - 1.32) | 0.00, 0.983                       | 0.99 (0.76 - 1.29) | 0.00, 0.958                       |
|                                                                                                                                                                                                                                                                                                | Non-Indigenous                                   | Reference          |                                   | Reference          |                                   | Reference          |                                   | Reference          |                                   |
| Geographical area                                                                                                                                                                                                                                                                              | Urban                                            | 1.24 (1.06 - 1.46) | 6.93, 0.008                       | 1.09 (0.92 - 1.29) | 1.03, 0.309                       | 1.11 (0.93 - 1.31) | 1.40, 0.237                       | 1.18 (1.00 - 1.39) | 3.82, 0.051                       |
|                                                                                                                                                                                                                                                                                                | Suburban                                         | 1.21 (1.04 - 1.41) | 5.92, 0.015                       | 1.11 (0.95 - 1.30) | 1.63, 0.202                       | 1.17 (0.99 - 1.37) | 3.57, 0.059                       | 1.16 (0.99 - 1.35) | 3.40, 0.065                       |
|                                                                                                                                                                                                                                                                                                | Rural/remote                                     | Reference          |                                   | Reference          |                                   | Reference          |                                   | Reference          |                                   |
| Income                                                                                                                                                                                                                                                                                         | \$150K or more                                   | 0.98 (0.81 - 1.20) | 0.02, 0.874                       | 1.28 (1.04 - 1.58) | 5.55, 0.018                       | 1.38 (1.12 - 1.70) | 8.97, 0.003                       | 1.30 (1.06 - 1.58) | 6.46, 0.011                       |

|                                                       |                          |                    |               |                    |                |                    |                |                    |                |
|-------------------------------------------------------|--------------------------|--------------------|---------------|--------------------|----------------|--------------------|----------------|--------------------|----------------|
|                                                       | \$80K - <\$150K          | 1.11 (0.94 - 1.30) | 1.50, 0.221   | 1.20 (1.01 - 1.44) | 4.13, 0.042    | 1.22 (1.02 - 1.45) | 4.70, 0.030    | 1.15 (0.97 - 1.36) | 2.54, 0.111    |
|                                                       | \$40K - <\$80K           | 1.03 (0.87 - 1.22) | 0.12, 0.725   | 1.05 (0.88 - 1.26) | 0.32, 0.574    | 1.07 (0.89 - 1.28) | 0.54, 0.463    | 0.98 (0.83 - 1.17) | 0.03, 0.859    |
|                                                       | less than \$40K          | Reference          |               | Reference          |                | Reference          |                | Reference          |                |
| Work/attend school outside home                       | Yes                      | 0.86 (0.70 - 1.06) | 2.10, 0.147   | 1.05 (0.84 - 1.32) | 0.21, 0.651    | 1.05 (0.83 - 1.32) | 0.16, 0.690    | 0.99 (0.80 - 1.23) | 0.00, 0.951    |
|                                                       | No                       | Reference          |               | Reference          |                | Reference          |                | Reference          |                |
| Work/attend school inside home                        | Yes                      | 1.04 (0.85 - 1.27) | 0.13, 0.718   | 0.97 (0.78 - 1.22) | 0.06, 0.810    | 1.03 (0.82 - 1.29) | 0.05, 0.819    | 0.96 (0.78 - 1.19) | 0.15, 0.703    |
|                                                       | No                       | Reference          |               | Reference          |                | Reference          |                | Reference          |                |
| Retired                                               | Yes                      | 0.84 (0.65 - 1.09) | 1.67, 0.196   | 0.74 (0.56 - 0.96) | 5.02, 0.025    | 0.73 (0.56 - 0.96) | 5.17, 0.023    | 0.74 (0.57 - 0.96) | 5.10, 0.024    |
|                                                       | No                       | Reference          |               | Reference          |                | Reference          |                | Reference          |                |
| Unemployed                                            | Yes                      | 1.04 (0.80 - 1.36) | 0.10, 0.754   | 1.08 (0.81 - 1.45) | 0.28, 0.599    | 1.19 (0.88 - 1.61) | 1.26, 0.262    | 1.05 (0.79 - 1.38) | 0.10, 0.757    |
|                                                       | No                       | Reference          |               | Reference          |                | Reference          |                | Reference          |                |
| On paid leave (sick leave, maternity, disability)     | Yes                      | 0.62 (0.42 - 0.91) | 6.09, 0.014   | 1.26 (0.81 - 1.97) | 1.03, 0.311    | 1.01 (0.64 - 1.57) | 0.00, 0.982    | 1.23 (0.81 - 1.88) | 0.92, 0.337    |
|                                                       | No                       | Reference          |               | Reference          |                | Reference          |                | Reference          |                |
| Other                                                 | Yes                      | 1.08 (0.77 - 1.53) | 0.21, 0.647   | 1.20 (0.83 - 1.73) | 0.93, 0.335    | 1.04 (0.72 - 1.51) | 0.04, 0.833    | 0.88 (0.62 - 1.26) | 0.46, 0.500    |
|                                                       | No                       | Reference          |               | Reference          |                | Reference          |                | Reference          |                |
| Rated physical health in general, for one's age       | Fair/poor                | 1.77 (1.52 - 2.07) | 53.19, <0.001 | 0.94 (0.79 - 1.12) | 0.53, 0.465    | 1.29 (1.08 - 1.55) | 7.70, 0.006    | 1.33 (1.12 - 1.57) | 10.98, <0.001  |
|                                                       | Excellent/very good/good | Reference          |               | Reference          |                | Reference          |                | Reference          |                |
| Rated mental health in general, for one's age         | Fair/poor                | 1.51 (1.29 - 1.76) | 27.09, <0.001 | 3.51 (2.86 - 4.30) | 146.15, <0.001 | 2.29 (1.87 - 2.80) | 64.84, <0.001  | 2.65 (2.21 - 3.16) | 113.93, <0.001 |
|                                                       | Excellent/very good/good | Reference          |               | Reference          |                | Reference          |                | Reference          |                |
| Anxiety or depression                                 | Diagnosed                | 1.57 (1.35 - 1.84) | 32.80, <0.001 | 2.00 (1.69 - 2.37) | 63.66, <0.001  | 1.59 (1.34 - 1.90) | 27.77, <0.001  | 1.97 (1.67 - 2.31) | 66.70, <0.001  |
|                                                       | Suffer                   | 1.56 (1.35 - 1.81) | 36.38, <0.001 | 2.90 (2.45 - 3.43) | 156.25, <0.001 | 2.50 (2.10 - 2.98) | 105.63, <0.001 | 2.44 (2.09 - 2.85) | 128.54, <0.001 |
|                                                       | Does not apply           | Reference          |               | Reference          |                | Reference          |                | Reference          |                |
| Rate of deaths during the previous 7 days             |                          | 1.12 (0.86 - 1.46) | 0.71, 0.398   | 1.38 (1.04 - 1.83) | 5.10, 0.024    | 1.04 (0.78 - 1.38) | 0.06, 0.807    | 1.24 (0.94 - 1.62) | 2.36, 0.125    |
| Rate of cases during the previous 7 days <sup>c</sup> |                          | 1.24 (1.11 - 1.39) | 14.45, <0.001 | 1.21 (1.07 - 1.36) | 9.23, 0.002    | 1.38 (1.21 - 1.56) | 24.89, <0.001  | 1.17 (1.05 - 1.32) | 7.41, 0.006    |

N number of complete observations used in the model; HL Hosmer-Lemeshow goodness of fit test, if  $p > 0.05$  then the model fits the data well; <sup>a</sup> people are assigned the OxCGRT value for stay-at-home orders that corresponds to the date they filled out the survey; <sup>b</sup> Wald Chi-square test from logistic regression with 1 degree of freedom comparing each level to the reference level within a variable, p-value based on Bonferroni correction; <sup>c</sup> OR is given for every 100 new cases reported. In instances where the confidence interval of the OR includes 1.00 yet is significant  $p < 0.05$ , this is due to rounding error.

**Table S5:** Adjusted odds ratios from logistic regression for the prevalence of “somewhat/much worse” versus “unchanged/improved” in each COVID-19 health related outcome and stringency index

| For each of the following, indicate how you have been personally affected by the COVID-19 pandemic (For each endpoint the probability of “Somewhat/much worse” is modelled, vs “unchanged/improved”). Odds ratio OR (95% confidence interval CI) is always compared to the reference category. |                         |                    |                                   |                    |                                   |                    |                                   |                    |                                   |
|------------------------------------------------------------------------------------------------------------------------------------------------------------------------------------------------------------------------------------------------------------------------------------------------|-------------------------|--------------------|-----------------------------------|--------------------|-----------------------------------|--------------------|-----------------------------------|--------------------|-----------------------------------|
| Variable                                                                                                                                                                                                                                                                                       | Categories              | Physical health    |                                   | Mental health      |                                   | Stress in life     |                                   | Overall wellbeing  |                                   |
|                                                                                                                                                                                                                                                                                                |                         | OR (95% CI)        | $\chi^2_1$ , p-value <sup>b</sup> | OR (95% CI)        | $\chi^2_1$ , p-value <sup>b</sup> | OR (95% CI)        | $\chi^2_1$ , p-value <sup>b</sup> | OR (95% CI)        | $\chi^2_1$ , p-value <sup>b</sup> |
| N, HL p-value                                                                                                                                                                                                                                                                                  |                         | 5874, 0.20         |                                   | 5864, 0.01         |                                   | 5873, 0.36         |                                   | 5873, 0.35         |                                   |
| Stringency Index (SI) <sup>a</sup>                                                                                                                                                                                                                                                             | 80≤SI                   | 1.22 (0.90 - 1.65) | 1.65, 0.199                       | 1.30 (0.95 - 1.79) | 2.65, 0.104                       | 1.05 (0.76 - 1.46) | 0.10, 0.756                       | 1.39 (1.02 - 1.89) | 4.44, 0.035                       |
|                                                                                                                                                                                                                                                                                                | 70≤SI<80                | 0.96 (0.74 - 1.25) | 0.09, 0.764                       | 0.81 (0.62 - 1.06) | 2.29, 0.130                       | 0.67 (0.50 - 0.88) | 8.27, 0.004                       | 1.03 (0.79 - 1.34) | 0.03, 0.852                       |
|                                                                                                                                                                                                                                                                                                | 60≤SI<70                | 0.91 (0.68 - 1.21) | 0.41, 0.521                       | 1.10 (0.82 - 1.49) | 0.42, 0.519                       | 0.74 (0.54 - 1.00) | 3.88, 0.049                       | 1.09 (0.82 - 1.45) | 0.34, 0.560                       |
|                                                                                                                                                                                                                                                                                                | 50≤SI<60                | Reference          |                                   | Reference          |                                   | Reference          |                                   | Reference          |                                   |
| Age group                                                                                                                                                                                                                                                                                      | 18 to 34                | 1.37 (1.16 - 1.63) | 13.10, <0.001                     | 1.72 (1.43 - 2.06) | 33.89, <0.001                     | 1.42 (1.18 - 1.70) | 13.43, <0.001                     | 1.26 (1.06 - 1.50) | 6.75, 0.009                       |
|                                                                                                                                                                                                                                                                                                | 35 to 54                | 1.25 (1.06 - 1.46) | 7.44, 0.006                       | 1.37 (1.16 - 1.61) | 14.36, <0.001                     | 1.21 (1.03 - 1.43) | 5.16, 0.023                       | 1.17 (1.00 - 1.37) | 3.62, 0.057                       |
|                                                                                                                                                                                                                                                                                                | 55+                     | Reference          |                                   | Reference          |                                   | Reference          |                                   | Reference          |                                   |
| Gender                                                                                                                                                                                                                                                                                         | Other/Prefer not to say | 1.21 (0.70 - 2.09) | 0.45, 0.504                       | 2.28 (1.02 - 5.08) | 4.03, 0.045                       | 0.89 (0.47 - 1.67) | 0.14, 0.708                       | 0.93 (0.51 - 1.68) | 0.06, 0.809                       |
|                                                                                                                                                                                                                                                                                                | Female                  | 0.87 (0.78 - 0.97) | 5.83, 0.016                       | 1.13 (1.01 - 1.27) | 4.33, 0.037                       | 1.32 (1.17 - 1.49) | 20.62, <0.001                     | 1.03 (0.92 - 1.15) | 0.21, 0.650                       |
|                                                                                                                                                                                                                                                                                                | Male                    | Reference          |                                   | Reference          |                                   | Reference          |                                   | Reference          |                                   |
| Indigenous status                                                                                                                                                                                                                                                                              | Indigenous              | 1.19 (0.93 - 1.53) | 1.94, 0.163                       | 1.00 (0.76 - 1.31) | 0.00, 0.979                       | 1.04 (0.79 - 1.38) | 0.08, 0.781                       | 1.02 (0.79 - 1.33) | 0.03, 0.871                       |
|                                                                                                                                                                                                                                                                                                | Non-Indigenous          | Reference          |                                   | Reference          |                                   | Reference          |                                   | Reference          |                                   |
| Geographical area                                                                                                                                                                                                                                                                              | Urban                   | 1.25 (1.07 - 1.47) | 7.43, 0.006                       | 1.10 (0.93 - 1.31) | 1.29, 0.256                       | 1.12 (0.94 - 1.33) | 1.70, 0.192                       | 1.19 (1.01 - 1.40) | 4.21, 0.040                       |
|                                                                                                                                                                                                                                                                                                | Suburban                | 1.22 (1.04 - 1.42) | 6.29, 0.012                       | 1.11 (0.94 - 1.30) | 1.60, 0.206                       | 1.18 (1.01 - 1.39) | 4.16, 0.041                       | 1.16 (0.99 - 1.35) | 3.42, 0.064                       |
|                                                                                                                                                                                                                                                                                                | Rural/remote            | Reference          |                                   | Reference          |                                   | Reference          |                                   | Reference          |                                   |
| Income                                                                                                                                                                                                                                                                                         | \$150K or more          | 0.98 (0.80 - 1.19) | 0.06, 0.804                       | 1.27 (1.03 - 1.56) | 4.90, 0.027                       | 1.35 (1.09 - 1.66) | 7.60, 0.006                       | 1.29 (1.05 - 1.57) | 6.08, 0.014                       |
|                                                                                                                                                                                                                                                                                                | \$80K - <\$150K         | 1.10 (0.93 - 1.29) | 1.25, 0.264                       | 1.19 (0.99 - 1.42) | 3.61, 0.057                       | 1.19 (1.00 - 1.42) | 3.66, 0.056                       | 1.14 (0.96 - 1.35) | 2.29, 0.130                       |

|                                                       |                          |                    |               |                    |                |                    |                |                    |                |
|-------------------------------------------------------|--------------------------|--------------------|---------------|--------------------|----------------|--------------------|----------------|--------------------|----------------|
|                                                       | \$40K - <\$80K           | 1.03 (0.87 - 1.22) | 0.12, 0.730   | 1.05 (0.88 - 1.26) | 0.31, 0.577    | 1.06 (0.89 - 1.27) | 0.41, 0.523    | 0.99 (0.83 - 1.17) | 0.03, 0.871    |
|                                                       | less than \$40K          | Reference          |               | Reference          |                | Reference          |                | Reference          |                |
| Work/attend school outside home                       | Yes                      | 0.87 (0.70 - 1.07) | 1.85, 0.174   | 1.07 (0.86 - 1.34) | 0.36, 0.546    | 1.07 (0.85 - 1.34) | 0.29, 0.591    | 1.00 (0.81 - 1.24) | 0.00, 0.977    |
|                                                       | No                       | Reference          |               | Reference          |                | Reference          |                | Reference          |                |
| Work/attend school inside home                        | Yes                      | 1.04 (0.85 - 1.27) | 0.12, 0.724   | 0.98 (0.78 - 1.22) | 0.05, 0.827    | 1.03 (0.82 - 1.29) | 0.05, 0.815    | 0.96 (0.77 - 1.18) | 0.16, 0.686    |
|                                                       | No                       | Reference          |               | Reference          |                | Reference          |                | Reference          |                |
| Retired                                               | Yes                      | 0.85 (0.66 - 1.10) | 1.57, 0.210   | 0.75 (0.57 - 0.98) | 4.57, 0.032    | 0.73 (0.56 - 0.96) | 4.95, 0.026    | 0.75 (0.57 - 0.97) | 4.85, 0.028    |
|                                                       | No                       | Reference          |               | Reference          |                | Reference          |                | Reference          |                |
| Unemployed                                            | Yes                      | 1.04 (0.80 - 1.36) | 0.10, 0.752   | 1.09 (0.81 - 1.46) | 0.31, 0.578    | 1.19 (0.88 - 1.61) | 1.28, 0.257    | 1.05 (0.79 - 1.38) | 0.10, 0.758    |
|                                                       | No                       | Reference          |               | Reference          |                | Reference          |                | Reference          |                |
| On paid leave (sick leave, maternity, disability)     | Yes                      | 0.62 (0.42 - 0.91) | 6.00, 0.014   | 1.27 (0.81 - 1.98) | 1.07, 0.301    | 1.02 (0.65 - 1.59) | 0.00, 0.945    | 1.23 (0.81 - 1.89) | 0.95, 0.330    |
|                                                       | No                       | Reference          |               | Reference          |                | Reference          |                | Reference          |                |
| Other                                                 | Yes                      | 1.09 (0.78 - 1.55) | 0.26, 0.607   | 1.23 (0.85 - 1.77) | 1.17, 0.280    | 1.06 (0.73 - 1.54) | 0.09, 0.763    | 0.89 (0.63 - 1.28) | 0.37, 0.541    |
|                                                       | No                       | Reference          |               | Reference          |                | Reference          |                | Reference          |                |
| Rated physical health in general, for one's age       | Fair/poor                | 1.77 (1.52 - 2.07) | 53.17, <0.001 | 0.94 (0.79 - 1.11) | 0.56, 0.454    | 1.28 (1.07 - 1.54) | 7.36, 0.007    | 1.33 (1.12 - 1.57) | 10.96, <0.001  |
|                                                       | Excellent/very good/good | Reference          |               | Reference          |                | Reference          |                | Reference          |                |
| Rated mental health in general, for one's age         | Fair/poor                | 1.50 (1.28 - 1.75) | 25.99, <0.001 | 3.47 (2.83 - 4.26) | 143.48, <0.001 | 2.26 (1.85 - 2.76) | 62.78, <0.001  | 2.62 (2.19 - 3.14) | 111.86, <0.001 |
|                                                       | Excellent/very good/good | Reference          |               | Reference          |                | Reference          |                | Reference          |                |
| Anxiety or depression                                 | Diagnosed                | 1.57 (1.34 - 1.84) | 32.41, <0.001 | 1.99 (1.68 - 2.36) | 63.07, <0.001  | 1.59 (1.34 - 1.89) | 27.40, <0.001  | 1.96 (1.67 - 2.31) | 66.20, <0.001  |
|                                                       | Suffer                   | 1.56 (1.35 - 1.80) | 35.52, <0.001 | 2.87 (2.42 - 3.39) | 152.44, <0.001 | 2.48 (2.08 - 2.95) | 103.03, <0.001 | 2.43 (2.08 - 2.83) | 126.53, <0.001 |
|                                                       | Does not apply           | Reference          |               | Reference          |                | Reference          |                | Reference          |                |
| Rate of deaths during the previous 7 days             |                          | 0.84 (0.64 - 1.11) | 1.50, 0.220   | 0.87 (0.65- 1.17)  | 0.84, 0.359    | 0.59 (0.44 - 0.80) | 11.78, <0.001  | 0.90 (0.68 - 1.20) | 0.51, 0.475    |
| Rate of cases during the previous 7 days <sup>c</sup> |                          | 1.26 (1.11 - 1.42) | 13.47, <0.001 | 1.16 (1.02 - 1.32) | 4.73, 0.030    | 1.42 (1.24 - 1.63) | 25.19, <0.001  | 1.15 (1.01 - 1.31) | 4.75, 0.029    |

N number of complete observations used in the model; HL Hosmer-Lemeshow goodness of fit test, if  $p > 0.05$  then the model fits the data well;

<sup>a</sup> people are assigned the OxCGRT value for stringency index that corresponds to the date they filled out the survey; <sup>b</sup> Wald Chi-square test from

logistic regression with 1 degree of freedom comparing each level to the reference level within a variable, p-value based on Bonferroni correction; <sup>c</sup> OR is given for every 100 new cases reported.

Parameter estimates derived from variables having a coefficient of variation (CV) between 16.6% and 33.3% were designated “E” and must be interpreted with caution due to the high sampling variability associated with it. No results are reported for cell frequencies less than 10. In instances where the confidence interval of the OR includes 1.00 yet is significant  $p < 0.05$ , this is due to rounding error.

**Table S6:** Prevalence (in percentage) of reported impact of COVID-19 on health-related outcomes and school closures

| Reported impact of COVID-19 on health-related outcomes |                        | School Closure value <sup>a</sup> |                    |                    |
|--------------------------------------------------------|------------------------|-----------------------------------|--------------------|--------------------|
|                                                        |                        | 1 (n=1235)                        | 2 (n=2464)         | 3 (n=2925)         |
| Physical health                                        | Somewhat/much worse    | 39.8 (37.1 - 42.5)                | 39.6 (37.7 - 41.6) | 47.4 (45.6 - 49.2) |
|                                                        | Unchanged              | 46.6 (43.9 - 49.4)                | 48.1 (46.2 - 50.1) | 40.9 (39.1 - 42.7) |
|                                                        | Somewhat/much improved | 13.6 (11.8 - 15.6)                | 12.2 (11.0 - 13.6) | 11.7 (10.6 - 12.9) |
| Mental health                                          | Somewhat/much worse    | 60.0 (57.2 - 62.7)                | 53.9 (51.9 - 55.9) | 63.8 (62.0 - 65.5) |
|                                                        | Unchanged              | 34.8 (32.2 - 37.5)                | 40.4 (38.4 - 42.3) | 32.3 (30.6 - 34)   |
|                                                        | Somewhat/much improved | 5.1 (4.0 - 6.5)                   | 5.7 (4.9 - 6.7)    | 3.9 (3.3 - 4.7)    |
| Stress in life                                         | Somewhat/much worse    | 65.9 (63.2 - 68.5)                | 62.8 (60.9 - 64.7) | 70.3 (68.6 - 72.0) |
|                                                        | Unchanged              | 28.1 (25.6 - 30.6)                | 31.1 (29.3 - 32.9) | 24.8 (23.2 - 26.4) |
|                                                        | Somewhat/much improved | 6.1 (4.9 - 7.5)                   | 6.1 (5.2 - 7.1)    | 4.9 (4.2 - 5.7)    |
| Overall wellbeing                                      | Somewhat/much worse    | 53.5 (50.7 - 56.3)                | 50.0 (48.0 - 52.0) | 59.3 (57.5 - 61.0) |
|                                                        | Unchanged              | 38.1 (35.4 - 40.9)                | 38.6 (36.7 - 40.6) | 32.5 (30.8 - 34.2) |
|                                                        | Somewhat/much improved | 8.4 (7.0 - 10.1)                  | 11.4 (10.2 - 12.7) | 8.2 (7.3 - 9.3)    |

<sup>a</sup> Participants are assigned the OxCGRT value for school closures that corresponds to the date they filled out the survey. There were no participants at level 0 of school closures, School closures: value 3 – all levels of school closed; value 2 – some levels of school closed; value 1 – schools recommended to close.

**Table S7:** Prevalence (in percentage) of reported impact of COVID-19 on health-related outcomes and business/workplace closures

| Reported impact of COVID-19 on health-related outcomes |                        | Business/workplace closure value <sup>a</sup> |                                |                    |                    |
|--------------------------------------------------------|------------------------|-----------------------------------------------|--------------------------------|--------------------|--------------------|
|                                                        |                        | 0 (n=115)                                     | 1 (n=119)                      | 2 (n=3261)         | 3 (n=3129)         |
| Physical health                                        | Somewhat/much worse    | 32.6 (24.7 - 41.6)                            | 36.1 (28.0 - 45.1)             | 39.8 (38.2 - 41.5) | 47.2 (45.4 - 48.9) |
|                                                        | Unchanged              | 52.9 (43.8 - 61.8)                            | 53.8 (44.8 - 62.5)             | 47.7 (46.0 - 49.4) | 40.8 (39.1 - 42.5) |
|                                                        | Somewhat/much improved | 14.5 (9.2 - 22.1) <sup>E</sup>                | 10.1 (5.9 - 16.8) <sup>E</sup> | 12.5 (11.4 - 13.6) | 12.0 (10.9 - 13.2) |
| Mental health                                          | Somewhat/much worse    | 51.4 (42.4 - 60.4)                            | 50.2 (41.3 - 59.0)             | 56.1 (54.4 - 57.8) | 63.5 (61.8 - 65.1) |
|                                                        | Unchanged              | 44.7 (36.0 - 53.9)                            | 43.6 (35.0 - 52.6)             | 38.3 (36.6 - 40)   | 32.5 (30.9 - 34.2) |
|                                                        | Somewhat/much improved | X                                             | X                              | 5.6 (4.9 - 6.4)    | 4.0 (3.4 - 4.7)    |
| Stress in life                                         | Somewhat/much worse    | 64.2 (55.1 - 72.4)                            | 60.9 (51.9 - 69.2)             | 63.9 (62.2 - 65.5) | 69.9 (68.3 - 71.5) |
|                                                        | Unchanged              | 30.3 (22.7 - 39.3)                            | 29.7 (22.2 - 38.5)             | 30.0 (28.4 - 31.6) | 25.2 (23.7 - 26.8) |
|                                                        | Somewhat/much improved | X                                             | 9.4 (5.3 - 16.0) <sup>E</sup>  | 6.1 (5.3 - 7.0)    | 4.8 (4.1 - 5.7)    |
| Overall wellbeing                                      | Somewhat/much worse    | 46.8 (37.9 - 55.9)                            | 45.0 (36.3 - 54.0)             | 51.7 (50.0 - 53.4) | 58.6 (56.8 - 60.3) |
|                                                        | Unchanged              | 47.2 (38.3 - 56.3)                            | 46.4 (37.7 - 55.3)             | 37.6 (35.9 - 39.2) | 33.2 (31.5 - 34.8) |
|                                                        | Somewhat/much improved | X                                             | 8.6 (4.8 - 15.0) <sup>E</sup>  | 10.7 (9.7 - 11.8)  | 8.2 (7.3 - 9.3)    |

<sup>a</sup> Participants are assigned the OxCGRT value for business/workplace closures that corresponds to the date they filled out the survey.

Business/workplace closures: value 3 – all non-essential businesses/workplaces closed; value 2 – some non-essential businesses/workplaces closed; value 1 – recommend to close non-essential businesses/workplaces; value 0 – no closures.

X less than 10 observations in the cell; E coefficient of variation (noted as <sup>E</sup>) is between 16.6% and 33.3%, interpret with caution

**Table S8:** Prevalence (in percentage) of reported impact of COVID-19 on health-related outcomes and restrictions on gatherings

| Reported impact of COVID-19 on health-related outcomes |                        | Restrictions on gathering value <sup>a</sup> |                    |
|--------------------------------------------------------|------------------------|----------------------------------------------|--------------------|
|                                                        |                        | 3 (n=375)                                    | 4 (n=6249)         |
| Physical health                                        | Somewhat/much worse    | 39.2 (34.4 - 44.2)                           | 43.3 (42.1 - 44.6) |
|                                                        | Unchanged              | 48.0 (42.9 - 53.0)                           | 44.4 (43.2 - 45.7) |
|                                                        | Somewhat/much improved | 12.8 (9.8 - 16.6)                            | 12.2 (11.4 - 13.1) |
| Mental health                                          | Somewhat/much worse    | 53.9 (48.8 - 58.9)                           | 59.7 (58.5 - 60.9) |
|                                                        | Unchanged              | 41.3 (36.5 - 46.4)                           | 35.4 (34.3 - 36.6) |
|                                                        | Somewhat/much improved | 4.8 (3.0 - 7.4) <sup>E</sup>                 | 4.8 (4.3 - 5.4)    |
| Stress in life                                         | Somewhat/much worse    | 61.6 (56.5 - 66.3)                           | 67.0 (65.8 - 68.2) |
|                                                        | Unchanged              | 32.1 (27.5 - 37.0)                           | 27.5 (26.4 - 28.6) |
|                                                        | Somewhat/much improved | 6.4 (4.3 - 9.3) <sup>E</sup>                 | 5.5 (5.0 - 6.1)    |
| Overall wellbeing                                      | Somewhat/much worse    | 48.6 (43.6 - 53.7)                           | 55.1 (53.9 - 56.3) |
|                                                        | Unchanged              | 44.2 (39.2 - 49.2)                           | 35.3 (34.1 - 36.5) |
|                                                        | Somewhat/much improved | 7.2 (5.0 - 10.3) <sup>E</sup>                | 9.6 (8.9 - 10.3)   |

<sup>a</sup> Participants are assigned the OxCGRT value for restrictions on gatherings that corresponds to the date they filled out the survey. There were no participants at level 0, 1 and 2 of restrictions on gatherings, Restrictions on gatherings: value 4 – 10 people or less permitted to meet; value 3 – 11 to 100 people permitted to meet.

<sup>E</sup> coefficient of variation (noted as <sup>E</sup>) is between 16.6% and 33.3%, interpret with caution

**Table S9:** Prevalence (in percentage) of reported impact of COVID-19 on health-related outcomes and stay-at-home orders

| Reported impact of COVID-19 on health-related outcomes |                        | Stay-at-home orders value <sup>a</sup> |                    |
|--------------------------------------------------------|------------------------|----------------------------------------|--------------------|
|                                                        |                        | 1 (n=2378)                             | 2 (n=4246)         |
| Physical health                                        | Somewhat/much worse    | 42.4 (40.4 - 44.4)                     | 43.5 (42.0 - 45.0) |
|                                                        | Unchanged              | 45.1 (43.1 - 47.1)                     | 44.4 (42.9 - 45.9) |
|                                                        | Somewhat/much improved | 12.5 (11.3 - 13.9)                     | 12.1 (11.1 - 13.1) |
| Mental health                                          | Somewhat/much worse    | 60.9 (58.9 - 62.9)                     | 58.5 (57.1 - 60.0) |
|                                                        | Unchanged              | 33.9 (32 - 35.8)                       | 36.8 (35.4 - 38.3) |
|                                                        | Somewhat/much improved | 5.2 (4.4 - 6.2)                        | 4.6 (4.0 - 5.3)    |
| Stress in life                                         | Somewhat/much worse    | 69.0 (67.1 - 70.8)                     | 65.4 (64.0 - 66.8) |
|                                                        | Unchanged              | 25.9 (24.2 - 27.7)                     | 28.8 (27.4 - 30.1) |
|                                                        | Somewhat/much improved | 5.1 (4.3 - 6.1)                        | 5.8 (5.1 - 6.5)    |
| Overall wellbeing                                      | Somewhat/much worse    | 54.9 (52.9 - 56.9)                     | 54.7 (53.2 - 56.2) |
|                                                        | Unchanged              | 36.8 (34.9 - 38.7)                     | 35.3 (33.9 - 36.7) |
|                                                        | Somewhat/much improved | 8.3 (7.3 - 9.5)                        | 10.1 (9.2 - 11.0)  |

<sup>a</sup> Participants are assigned the OxCGRT value for stay-at-home orders that corresponds to the date they filled out the survey. There were no participants at values 0 and 3 of stay-at-home orders, Stay-at-home orders: value 2 – leaving home permitted for essential trips; value 1 – recommend not leave home.

**Table S10:** Prevalence (in percentage) of reported impact of COVID-19 on health-related outcomes and stringency index

| Reported impact of COVID-19 on health-related outcomes |                        | Stringency index value <sup>a</sup> |                      |                      |                    |
|--------------------------------------------------------|------------------------|-------------------------------------|----------------------|----------------------|--------------------|
|                                                        |                        | 50 - <60<br>(n=2714)                | 60 - <70<br>(n=1693) | 70 - <80<br>(n=1867) | 80+<br>(n=350)     |
| Physical health                                        | Somewhat/much worse    | 36.9 (32.0 - 42.1)                  | 42.4 (40.2 - 44.7)   | 37.2 (35 - 39.6)     | 48.0 (46.2 - 49.9) |
|                                                        | Unchanged              | 52.4 (47.1 - 57.6)                  | 44.5 (42.2 - 46.7)   | 50.9 (48.6 - 53.3)   | 39.8 (38 - 41.7)   |
|                                                        | Somewhat/much improved | 10.8 (7.9 - 14.4)                   | 13.1 (11.7 - 14.7)   | 11.8 (10.4 - 13.4)   | 12.1 (10.9 - 13.4) |
| Mental health                                          | Somewhat/much worse    | 54.9 (49.6 - 60.0)                  | 61.5 (59.3 - 63.7)   | 50.6 (48.2 - 53.0)   | 64.0 (62.2 - 65.8) |
|                                                        | Unchanged              | 42.1 (37.0 - 47.3)                  | 32.7 (30.6 - 34.9)   | 43.9 (41.6 - 46.3)   | 32.0 (30.3 - 33.8) |
|                                                        | Somewhat/much improved | 3.0 (1.7 - 5.4) <sup>E</sup>        | 5.8 (4.8 - 6.9)      | 5.5 (4.5 - 6.7)      | 4.0 (3.3 - 4.8)    |
| Stress in life                                         | Somewhat/much worse    | 65.8 (60.7 - 70.6)                  | 68.9 (66.7 - 70.9)   | 57.6 (55.2 - 59.9)   | 71.0 (69.3 - 72.7) |
|                                                        | Unchanged              | 29.3 (24.8 - 34.3)                  | 25.8 (23.8 - 27.8)   | 35.8 (33.6 - 38.1)   | 23.8 (22.3 - 25.5) |
|                                                        | Somewhat/much improved | 4.9 (3.1 - 7.7) <sup>E</sup>        | 5.4 (4.4 - 6.5)      | 6.6 (5.5 - 7.9)      | 5.2 (4.4 - 6.1)    |
| Overall wellbeing                                      | Somewhat/much worse    | 49.0 (43.8 - 54.2)                  | 55.1 (52.8 - 57.3)   | 48.2 (45.8 - 50.6)   | 59.3 (57.5 - 61.2) |
|                                                        | Unchanged              | 45.2 (40.1 - 50.5)                  | 35.9 (33.7 - 38.1)   | 39.7 (37.4 - 42.1)   | 32.1 (30.4 - 33.9) |
|                                                        | Somewhat/much improved | 5.8 (3.8 - 8.8) <sup>E</sup>        | 9.1 (7.8 - 10.5)     | 12.1 (10.6 - 13.7)   | 8.5 (7.5 - 9.6)    |

<sup>a</sup> Participants are assigned the OxCGRT stringency index value that corresponds to the date they filled out the survey.

<sup>E</sup> coefficient of variation (noted as <sup>E</sup>) is between 16.6% and 33.3%, interpret with caution

Multinomial logistic regression model modelling the prevalence of “much worse” and “somewhat worse” compared to “unchanged/improved”. The first table reports the odds ratios for the prevalence of “much worse” versus “unchanged / improved”. The second table reports the odds ratios for the prevalence of “somewhat worse” versus “unchanged / improved”. Tables S11 and S12 present the adjusted odds ratios extracted from the 20 multinomial models which are equivalent to the main models regarding the covariates. Odds ratios of the covariates are suppressed for ease of reading the results.

**Table S11:** Adjusted odds ratios for the prevalence of “much worse” versus “unchanged/improved” in the multinomial logistic regression model

| OxCGRT Variable <sup>a</sup> | Class                                                    | Physical health    |                                   | Mental health      |                                   | Stress in life     |                                   | Overall wellbeing  |                                   |
|------------------------------|----------------------------------------------------------|--------------------|-----------------------------------|--------------------|-----------------------------------|--------------------|-----------------------------------|--------------------|-----------------------------------|
|                              |                                                          | OR (95% CI)        | $\chi^2_1$ , p-value <sup>b</sup> | OR (95% CI)        | $\chi^2_1$ , p-value <sup>b</sup> | OR (95% CI)        | $\chi^2_1$ , p-value <sup>b</sup> | OR (95% CI)        | $\chi^2_1$ , p-value <sup>b</sup> |
| Stringency Index             | 80+                                                      | 1.07 (0.59 - 1.94) | 0.06, 0.814                       | 1.48 (0.88 - 2.48) | 2.21, 0.137                       | 0.98 (0.62 - 1.56) | 0.01, 0.934                       | 1.07 (0.62 - 1.86) | 0.06, 0.808                       |
|                              | 70 to <80                                                | 0.95 (0.56 - 1.61) | 0.04, 0.841                       | 1.13 (0.71 - 1.79) | 0.26, 0.610                       | 0.75 (0.50 - 1.13) | 1.88, 0.170                       | 1.21 (0.74 - 1.98) | 0.59, 0.441                       |
|                              | 60 to <70                                                | 0.75 (0.43 - 1.33) | 0.95, 0.330                       | 1.01 (0.62 - 1.67) | 0.00, 0.955                       | 0.77 (0.49 - 1.20) | 1.34, 0.246                       | 0.96 (0.56 - 1.63) | 0.03, 0.874                       |
|                              | 50 to <60                                                | Reference          |                                   | Reference          |                                   | Reference          |                                   | Reference          |                                   |
| School closure               | 3=All levels of school closed                            | 1.11 (0.75 - 1.64) | 0.28, 0.599                       | 1.40 (1.02 - 1.93) | 4.21, 0.040                       | 1.21 (0.90 - 1.62) | 1.66, 0.197                       | 1.01 (0.71 - 1.44) | 0.00, 0.946                       |
|                              | 2=Some levels of school closed                           | 1.06 (0.77 - 1.46) | 0.14, 0.710                       | 0.91 (0.69 - 1.20) | 0.44, 0.506                       | 0.90 (0.71 - 1.15) | 0.71, 0.400                       | 0.98 (0.73 - 1.30) | 0.03, 0.874                       |
|                              | 1=Schools recommended to close                           | Reference          |                                   | Reference          |                                   | Reference          |                                   | Reference          |                                   |
|                              | 0=No restrictions                                        | No data            |                                   | No data            |                                   | No data            |                                   | No data            |                                   |
| Business/workplace closure   | 3=All non-essential businesses/workplaces closed         | 0.78 (0.30 - 1.99) | 0.27, 0.600                       | 2.58 (1.05 - 6.33) | 4.29, 0.038                       | 0.85 (0.40 - 1.82) | 0.17, 0.685                       | 1.27 (0.52 - 3.14) | 0.28, 0.598                       |
|                              | 2=Some non-essential businesses/workplaces closed        | 0.65 (0.27 - 1.57) | 0.92, 0.338                       | 1.67 (0.71 - 3.93) | 1.36, 0.244                       | 0.66 (0.32 - 1.35) | 1.30, 0.255                       | 1.14 (0.49 - 2.68) | 0.09, 0.759                       |
|                              | 1=Recommend to close non-essential businesses/workplaces | 1.30 (0.41 - 4.17) | 0.20, 0.659                       | 1.45 (0.45 - 4.63) | 0.39, 0.532                       | 0.57 (0.20 - 1.59) | 1.15, 0.283                       | 0.68 (0.19 - 2.43) | 0.35, 0.553                       |
|                              | 0=No closures                                            | Reference          |                                   | Reference          |                                   | Reference          |                                   | Reference          |                                   |
| Restrictions on gatherings   | 4 = ≤10 people                                           | 0.65 (0.38 - 1.13) | 2.33, 0.127                       | 0.88 (0.55 - 1.42) | 0.27, 0.602                       | 0.76 (0.50 - 1.16) | 1.60, 0.206                       | 1.04 (0.62 - 1.76) | 0.03, 0.873                       |
|                              | 3 = 11-100 people                                        | Reference          |                                   | Reference          |                                   | Reference          |                                   | Reference          |                                   |
|                              | 2 = 101-1000 people                                      | No data            |                                   | No data            |                                   | No data            |                                   | No data            |                                   |
|                              | 1 = >1000 people                                         | No data            |                                   | No data            |                                   | No data            |                                   | No data            |                                   |
|                              | 0 = no restrictions                                      | No data            |                                   | No data            |                                   | No data            |                                   | No data            |                                   |
| Stay at home orders          | 3=Leaving home permitted with minimal exceptions         | No data            |                                   | No data            |                                   | No data            |                                   | No data            |                                   |
|                              | 2=Leaving home permitted for essential trips             | 1.16 (0.81 - 1.67) | 0.68, 0.410                       | 1.00 (0.74 - 1.36) | 0.00, 0.999                       | 0.88 (0.67 - 1.16) | 0.82, 0.365                       | 1.31 (0.94 - 1.84) | 2.51, 0.113                       |

|  |                            |           |  |           |  |           |  |           |  |
|--|----------------------------|-----------|--|-----------|--|-----------|--|-----------|--|
|  | 1=Recommend not leave home | Reference |  | Reference |  | Reference |  | Reference |  |
|  | 0=No restrictions          | No data   |  | No data   |  | No data   |  | No data   |  |

<sup>a</sup> Participants are assigned the OxCGRT value for stringency index, school closures, business/workplace closures, restrictions on gatherings and stay-at-home orders that corresponds to the date they filled out the survey; <sup>b</sup> All models were adjusted for age, gender, Indigenous status, geographical location, income, work status, general physical and mental health, anxiety/depression, rate of death due to COVID-19 and rate of COVID-19 cases per 100,000. Wald Chi-square test from logistic regression with 1 degree of freedom comparing each level to the reference level within a variable, p-value based on Bonferroni correction.

**Table S12:** Adjusted odds ratios for the prevalence of “somewhat worse” versus “unchanged/improved” in the multinomial logistic regression model

| OxCGRT Variable <sup>a</sup> | Class                                                    | Physical health    |                                   | Mental health      |                                   | Stress in life     |                                   | Overall wellbeing  |                                   |
|------------------------------|----------------------------------------------------------|--------------------|-----------------------------------|--------------------|-----------------------------------|--------------------|-----------------------------------|--------------------|-----------------------------------|
|                              |                                                          | OR (95% CI)        | $\chi^2_1$ , p-value <sub>b</sub> | OR (95% CI)        | $\chi^2_1$ , p-value <sub>b</sub> | OR (95% CI)        | $\chi^2_1$ , p-value <sub>b</sub> | OR (95% CI)        | $\chi^2_1$ , p-value <sub>b</sub> |
| Stringency Index             | 80+                                                      | 1.25 (0.91 - 1.71) | 1.86, 0.172                       | 1.27 (0.92 - 1.76) | 2.14, 0.144                       | 1.08 (0.78 - 1.51) | 0.22, 0.638                       | 1.45 (1.06 - 2.00) | 5.37, 0.020                       |
|                              | 70 to <80                                                | 0.96 (0.73 - 1.27) | 0.08, 0.775                       | 0.77 (0.58 - 1.01) | 3.50, 0.061                       | 0.65 (0.49 - 0.87) | 8.42, 0.004                       | 1.00 (0.76 - 1.31) | 0.00, 0.998                       |
|                              | 60 to <70                                                | 0.94 (0.70 - 1.27) | 0.15, 0.695                       | 1.14 (0.84 - 1.54) | 0.67, 0.412                       | 0.74 (0.54 - 1.01) | 3.50, 0.061                       | 1.12 (0.83 - 1.50) | 0.55, 0.460                       |
|                              | 50 to <60                                                | Reference          |                                   | Reference          |                                   | Reference          |                                   | Reference          |                                   |
| School closure               | 3=All levels of school closed                            | 1.15 (0.94 - 1.40) | 1.90, 0.168                       | 1.00 (0.81 - 1.22) | 0.00, 0.971                       | 1.22 (0.99 - 1.50) | 3.31, 0.069                       | 1.19 (0.98 - 1.45) | 2.95, 0.086                       |
|                              | 2=Some levels of school closed                           | 0.93 (0.79 - 1.10) | 0.68, 0.410                       | 0.67 (0.57 - 0.79) | 21.24, <0.001                     | 0.87 (0.73 - 1.03) | 2.48, 0.115                       | 0.82 (0.69 - 0.96) | 5.79, 0.016                       |
|                              | 1=Schools recommended to close                           | Reference          |                                   | Reference          |                                   | Reference          |                                   | Reference          |                                   |
|                              | 0=No restrictions                                        | No data            |                                   | No data            |                                   | No data            |                                   | No data            |                                   |
| Business/workplace closure   | 3=All non-essential businesses/workplaces closed         | 1.47 (0.88 - 2.47) | 2.12, 0.145                       | 1.50 (0.91 - 2.49) | 2.51, 0.113                       | 0.81 (0.48 - 1.37) | 0.61, 0.436                       | 1.41 (0.86 - 2.33) | 1.86, 0.172                       |
|                              | 2=Some non-essential businesses/workplaces closed        | 1.15 (0.70 - 1.88) | 0.29, 0.590                       | 1.06 (0.66 - 1.70) | 0.06, 0.811                       | 0.59 (0.36 - 0.96) | 4.46, 0.035                       | 1.04 (0.65 - 1.67) | 0.03, 0.856                       |
|                              | 1=Recommend to close non-essential businesses/workplaces | 1.54 (0.82 - 2.91) | 1.79, 0.181                       | 1.27 (0.68 - 2.36) | 0.57, 0.450                       | 0.85 (0.45 - 1.59) | 0.27, 0.604                       | 1.09 (0.59 - 2.01) | 0.08, 0.784                       |
|                              | 0=No closures                                            | Reference          |                                   | Reference          |                                   | Reference          |                                   | Reference          |                                   |
| Restrictions on gatherings   | 4 = ≤10 people                                           | 0.71 (0.54 - 0.94) | 5.88, 0.015                       | 0.83 (0.63 - 1.11) | 1.57, 0.211                       | 0.76 (0.57 - 1.01) | 3.59, 0.058                       | 0.88 (0.66 - 1.16) | 0.86, 0.353                       |
|                              | 3 = 11-100 people                                        | Reference          |                                   | Reference          |                                   | Reference          |                                   | Reference          |                                   |
|                              | 2 = 101-1000 people                                      | No data            |                                   | No data            |                                   | No data            |                                   | No data            |                                   |
|                              | 1 = >1000 people                                         | No data            |                                   | No data            |                                   | No data            |                                   | No data            |                                   |
|                              | 0 = no restrictions                                      | No data            |                                   | No data            |                                   | No data            |                                   | No data            |                                   |
| Stay at home orders          | 3= Leaving home permitted for minimal exceptions         | No data            |                                   | No data            |                                   | No data            |                                   | No data            |                                   |
|                              | 2=Leaving home permitted for essential trips             | 0.97 (0.81 - 1.17) | 0.08, 0.772                       | 0.71 (0.59 - 0.87) | 11.54, <0.001                     | 0.79 (0.65 - 0.96) | 5.49, 0.019                       | 0.88 (0.73 - 1.06) | 1.76, 0.185                       |
|                              | 1=Recommend not leave home                               | Reference          |                                   | Reference          |                                   | Reference          |                                   | Reference          |                                   |
|                              | 0=No restrictions                                        | No data            |                                   | No data            |                                   | No data            |                                   | No data            |                                   |

<sup>a</sup> Participants are assigned the OxCGRT value for stringency index, school closures, business/workplace closures, restrictions on gatherings and stay-at-home orders that corresponds to the date they filled out the survey; <sup>b</sup> All models were adjusted for age, gender, Indigenous status,

geographical location, income, work status, general physical and mental health, anxiety/depression, rate of death due to COVID-19 and rate of COVID-19 cases per 100,000. Wald Chi-square test from logistic regression with 1 degree of freedom comparing each level to the reference level within a variable, p-value based on Bonferroni correction.
